# Supplementary material
Source: PubMed Central journal article supplement (PMC1289417)
Supplement: mbc_E05-06-0508_1.pdf [file mbc_E05-06-0508_1.pdf]

| Organism              | family name                  | subfamily name | complex                  | catalytic subunit | actin | Arp4 | Arp5 | Arp6 | Arp7 | Arp8 | Arp9 | function                      | reference                                               |                                   |
|-----------------------|------------------------------|----------------|--------------------------|-------------------|-------|------|------|------|------|------|------|-------------------------------|---------------------------------------------------------|-----------------------------------|
| <i>S.cerevisiae</i>   | chromatin remodeling complex | SWI2/SNF2      | SWI/SNF                  | Swi2/Snf2         |       |      |      |      | ✓    |      | ✓    | chromatin remodeling          | Peterson <i>et al.</i> , 1998                           |                                   |
|                       |                              |                | RSC                      | Sth1/Nps1         |       |      |      |      | ✓    |      | ✓    |                               | Cairns <i>et al.</i> , 1998                             |                                   |
|                       |                              | INO80          | Ino80                    | Ino80             | ✓*1   | ✓    | ✓    |      |      | ✓    |      |                               | Shen <i>et al.</i> , 2000                               |                                   |
|                       |                              | SWR1           | SWR1                     | Swr1              | ✓*1   | ✓    |      | ✓    |      |      |      | histone H2A valiant exchange  | Mizuguchi <i>et al.</i> , 2004                          |                                   |
|                       | HAT complex                  |                | NuA4                     | Esa1              | ✓*1   | ✓    |      |      |      |      |      | histone acethylation          | Galarneau <i>et al.</i> , 2000                          |                                   |
| <i>D.melanogaster</i> | chromatin remodeling complex | SWI2/SNF2      | BAP                      | Brahma            | ✓     | ✓*3  |      |      |      |      |      | chromatin remodeling          | Papoulas <i>et al.</i> , 1998                           |                                   |
|                       |                              |                | PBAP                     | Brahma            | ✓     | ✓*3  |      |      |      |      |      |                               |                                                         | Mohrman <i>et al.</i> , 2004      |
| <i>H.sapiens</i>      | chromatin remodeling complex | SWI2/SNF2      | SWI/SNF (BAF, SWI/SNF-A) | Brg1 or hBRM      | ✓*2   | ✓*4  |      |      |      |      |      | chromatin remodeling          | Zhao <i>et al.</i> , 1998                               |                                   |
|                       |                              |                | SWI/SNF (bBAF)           | Brg1 or hBRM      | ✓*2   | ✓*5  |      |      |      |      |      |                               | Kuroda <i>et al.</i> , 2002; Olave <i>et al.</i> , 2002 |                                   |
|                       |                              |                | PBAF(SWI/SNF-B)          | Brg1              | ✓*2   | ✓*4  |      |      |      |      |      |                               |                                                         | Nie <i>et al.</i> , 2000          |
|                       |                              |                | WINAC                    | Brg1 or hBRM      |       | ✓*4  |      |      |      |      |      |                               |                                                         | WINAC: vitamin D receptor binding |
|                       |                              | SWR1           | p400                     | p400              | ✓*2   | ✓*4  |      |      |      |      |      | chromatin remodeling          | Fuch <i>et al.</i> , 2001                               |                                   |
|                       | HAT complex                  |                | SRCAP                    | SRCAP             |       | ✓*4  |      | ✓    |      |      |      | histone H2A valiant exchange? | Cai <i>et al.</i> , 2005                                |                                   |
|                       | HAT complex                  |                | TIP60                    | Tip60             | ✓*2   | ✓*4  |      |      |      |      |      | histone acetylation           | Ikura <i>et al.</i> , 2000                              |                                   |

\*1 Act1

\*2 □-actin

\*3 BAP55

\*4 ArpN□/BAF53a

\*5 ArpN□/BAF53b (specific in neuron)
